# Supplementary material for: The Effects of 2′-O-Methoxyethyl Containing Antisense Oligonucleotides on Platelets in Human Clinical Trials
Source: PubMed Central journal article supplement — Nucleic Acid Ther. 2017 Jun 1;27(3):121–9. doi: 10.1089/nat.2016.0650 (PMC5467133; doi:10.1089/nat.2016.0650), 2017-06-01
Supplement: Supp_Data.pdf [file Supp_Data.pdf]

## Supplementary Data

### Detailed Methods

Clinical studies were performed in compliance with the guidelines of good clinical practice and Declaration of Helsinki. All human subjects gave written informed consent. Data were imported from individual study data sets into one SAS dataset for each laboratory test [1]. Evaluated subjects received at least one dose of study drug.

The integrated safety database (ISDB) contains data collected from a total of 59 trials for 16 distinct, second-generation, 2'-*O*-methoxyethyl (2'MOE)-modified antisense oligonucleotides (ASOs). This collection represents 32 phase 1 (sixteen 2'MOE ASOs), 21 phase 2 (ten 2'MOE ASOs), and 6 phase 3 (one 2'MOE ASO) [2–7] trials. Forty-three of these trials were randomized placebo controlled (sixteen 2'MOE ASOs), 13 were open label (five 2'MOE ASOs)—4 of which were drug–drug interaction trials (three 2'MOE ASOs), and 2 trials were long-term open-label extensions (one 2'MOE ASO).

SUPPLEMENTARY TABLE S1. 2'-*O*-METHOXYETHYL ANTISENSE OLIGONUCLEOTIDE TRIALS IN INTEGRATED SAFETY DATABASE

| Count, n           | Phase 1 |          | Phase 2         |          | Phase 3 |          | 2'MOE ASO, systemic |          |
|--------------------|---------|----------|-----------------|----------|---------|----------|---------------------|----------|
|                    | Trials  | Subjects | Trials          | Subjects | Trials  | Subjects | Trials              | Subjects |
| RCT                | 20      | 956      | 18 <sup>a</sup> | 1,049    | 5       | 699      | 43 <sup>a</sup>     | 2,704    |
| OL                 | 5       | 78       | 3               | 340      | 1       | 143      | 9                   | 561      |
| DDI                | 4       | 84       | 0               | 0        | 0       | 0        | 4                   | 84       |
| Other <sup>b</sup> | 3       | 127      | 0               | 0        | 0       | 0        | 3                   | 127      |
| Total              | 32      | 1,245    | 21              | 1,389    | 6       | 842      | 59                  | 3,476    |

<sup>a</sup>One trial excluded from the phase 2 RCT data set (0 placebo, 2 active). <sup>b</sup>Includes two trials with crossover design and one single-dose tolerability trial with protocol-specified exposure to corticosteroids.

2'MOE, 2'-*O*-methoxyethyl; ASOs, antisense oligonucleotides; DDI, drug–drug interaction; OL, open label; RCT, randomized placebo-controlled trial.

Data are presented by the incidence of platelet events and descriptive summary statistics of platelet test results. Analyses on the incidence of platelet events were based on confirmed test results, as defined in table footnotes. Baseline (BSLN) was defined as the last value before the first dose. All study data were included for analyses of the incidence of events. Any exceptions are indicated by footnote in the respective tables. Two subject inclusion criteria were used for the incidence analyses. One criterion included subjects who had at least one post-BSLN measure to evaluate the incidence of confirmed post-BSLN platelets  $<0.7 \times \text{BSLN}$ ,  $<0.5 \times \text{BSLN}$ ,  $<\text{LLN}$ ,  $<75 \text{ K}/\mu\text{L}$ , and  $<50 \text{ K}/\mu\text{L}$ . The second criterion included subjects who had a BSLN value in the normal range and at least one post-BSLN measure to evaluate the incidence of confirmed threshold events by the following five platelet count brackets,  $<\text{LLN}$  to 100,  $<100\text{--}75$ ,  $<75\text{--}50$ ,  $<50\text{--}25$ , and  $<25 \text{ K}/\mu\text{L}$ .

## 2'MOE ASO Systemic, RCT/OL Trials

SUPPLEMENTARY TABLE S2. BASELINE CHARACTERISTICS OF 2'-O-METHOXYETHYL ANTISENSE OLIGONUCLEOTIDE SYSTEMIC DATASET (52 TRIALS, RANDOMIZED PLACEBO-CONTROLLED TRIAL/OPEN LABEL)

| <i>Systemic RCT/OL</i> | <i>2'MOE ASO dose (mg/week)</i> |                  |                 |                   |                    |                    |                    |                |
|------------------------|---------------------------------|------------------|-----------------|-------------------|--------------------|--------------------|--------------------|----------------|
|                        | <i>Placebo</i>                  | <i>ASO total</i> | <i>&gt;0–75</i> | <i>&gt;75–175</i> | <i>&gt;175–275</i> | <i>&gt;275–375</i> | <i>&gt;375–475</i> | <i>&gt;475</i> |
| <i>n</i>               | 784                             | 2,407            | 167             | 365               | 1,329              | 270                | 235                | 41             |
| Gender                 |                                 |                  |                 |                   |                    |                    |                    |                |
| Female                 | 330 (42.1%)                     | 1,086 (45.1%)    | 37 (22.2%)      | 156 (42.7%)       | 652 (49.1%)        | 135 (50.0%)        | 96 (40.9%)         | 10 (24.4%)     |
| Male                   | 454 (57.9%)                     | 1,321 (54.9%)    | 130 (77.8%)     | 209 (57.3%)       | 677 (50.9%)        | 135 (50.0%)        | 139 (59.1%)        | 31 (75.6%)     |
| Race                   |                                 |                  |                 |                   |                    |                    |                    |                |
| White                  | 652 (83.2%)                     | 2,069 (86.0%)    | 140 (83.8%)     | 304 (83.3%)       | 1,137 (85.6%)      | 254 (94.1%)        | 201 (85.5%)        | 33 (80.5%)     |
| Black                  | 78 (9.9%)                       | 180 (7.5%)       | 16 (9.6%)       | 28 (7.7%)         | 101 (7.6%)         | 8 (3.0%)           | 20 (8.5%)          | 7 (17.1%)      |
| Asian                  | 25 (3.2%)                       | 78 (3.2%)        | 4 (2.4%)        | 16 (4.4%)         | 49 (3.7%)          | 2 (0.7%)           | 6 (2.6%)           | 1 (2.4%)       |
| Hispanic               | 7 (0.9%)                        | 17 (0.7%)        | 0 (0.0%)        | 7 (1.9%)          | 4 (0.3%)           | 0 (0.0%)           | 6 (2.6%)           | 0 (0.0%)       |
| Other                  | 22 (2.8%)                       | 62 (2.6%)        | 7 (4.2%)        | 10 (2.7%)         | 37 (2.8%)          | 6 (2.2%)           | 2 (0.9%)           | 0 (0.0%)       |
| Age, years             |                                 |                  |                 |                   |                    |                    |                    |                |
| Mean (SD)              | 50.2 (13.6)                     | 50.6 (13.9)      | 41.3 (13.2)     | 46.9 (13.9)       | 53.2 (13.1)        | 53.4 (12.8)        | 47.1 (14.1)        | 39.9 (15.3)    |
| BMI, kg/m <sup>2</sup> |                                 |                  |                 |                   |                    |                    |                    |                |
| Mean (SD)              | 28.5 (4.8)                      | 28.6 (5.3)       | 26.1 (3.2)      | 27.8 (5.4)        | 29.2 (5.4)         | 29.5 (5.1)         | 27.3 (4.8)         | 26.9 (4.2)     |
| Platelets, K/ $\mu$ L  |                                 |                  |                 |                   |                    |                    |                    |                |
| Mean (SD)              | 241 (62)                        | 245 (67)         | 239 (54)        | 252 (62)          | 241 (65)           | 247 (62)           | 260 (97)           | 227 (54)       |

SUPPLEMENTARY TABLE S3. DATA EXCLUDED FROM 2'-O-METHOXYETHYL ANTISENSE OLIGONUCLEOTIDE SYSTEMIC DATASET ANALYSIS

| <i>Trial design</i>           | <i>2'MOE ASOs, n</i> | <i>Trials, n</i> | <i>Subjects, n</i> |
|-------------------------------|----------------------|------------------|--------------------|
| Drug–drug interaction         | 3                    | 4 <sup>a</sup>   | 84                 |
| Oral bioavailability          | 1                    | 1                | 24                 |
| Tolerability                  | 1                    | 1                | 60                 |
| Crossover design              | 2                    | 2                | 67                 |
| Comparator group <sup>b</sup> | 1                    | 1                | 74                 |

<sup>a</sup>See Supplementary Table S4 for results on post-BSLN platelet counts in phase 1 DDI trials.

<sup>b</sup>Two subjects were excluded from evaluable population of published report [8].

### Phase 1 Drug–Drug Interaction Trials

Three 2'MOE ASOs were evaluated for drug–drug interactions (four trials) using a crossover trial design with all subjects exposed to a 2'MOE ASO.

Drugs tested: simvastatin, ezetimibe, warfarin, enoxaparin, metformin, glipizide, and rosiglitazone

SUPPLEMENTARY TABLE S4. INCIDENCE OF CONFIRMED PLATELET REDUCTIONS IN FOUR DRUG–DRUG INTERACTION TRIALS

| <i>Post-BSLN platelet levels</i>    |                  | <i>2'MOE ASO dose (mg/week)</i> |                   |                    |                    |                    |                |
|-------------------------------------|------------------|---------------------------------|-------------------|--------------------|--------------------|--------------------|----------------|
| <i>Confirmed,<sup>a</sup> n (%)</i> | <i>ASO total</i> | <i>&gt;0–75</i>                 | <i>&gt;75–175</i> | <i>&gt;175–275</i> | <i>&gt;275–375</i> | <i>&gt;375–475</i> | <i>&gt;475</i> |
| <i>N</i>                            | 84               | 0                               | 0                 | 84                 | 0                  | 0                  | 0              |
| <0.7 × BSLN                         | 1 (1.2)          |                                 |                   | 1 (1.2)            |                    |                    |                |
| <0.5 × BSLN                         | 0 (0)            |                                 |                   | 0 (0)              |                    |                    |                |
| <LLN                                | 2 (2.4)          |                                 |                   | 2 (2.4)            |                    |                    |                |
| <75 K/μL                            | 0 (0)            |                                 |                   | 0 (0)              |                    |                    |                |
| <50 K/μL                            | 0 (0)            |                                 |                   | 0 (0)              |                    |                    |                |
| <i>n<sup>b</sup></i>                | 82               | 0                               | 0                 | 82                 | 0                  | 0                  | 0              |
| LLN-100 K/μL                        | 2 (2.4)          |                                 |                   | 2 (2.4)            |                    |                    |                |
| <100–75 K/μL                        | 0 (0)            |                                 |                   | 0 (0)              |                    |                    |                |
| <75–50 K/μL                         | 0 (0)            |                                 |                   | 0 (0)              |                    |                    |                |
| <50–25 K/μL                         | 0 (0)            |                                 |                   | 0 (0)              |                    |                    |                |
| <25 K/μL                            | 0 (0)            |                                 |                   | 0 (0)              |                    |                    |                |

<sup>a</sup>Confirmed was defined as a consecutive (next) abnormal laboratory value after the initial observation. If there was no consecutive test to confirm, then the initial observation was presumed confirmed.

<sup>b</sup>Number of subjects with normal BSLN platelet counts and with post-BSLN values. Lowest confirmed category was reported for each subject. BSLN, baseline; LLN, lower limit of normal.

### Randomized Placebo-Controlled Trials

SUPPLEMENTARY TABLE S5. BASELINE CHARACTERISTICS OF RANDOMIZED PLACEBO-CONTROLLED DATASET (42 TRIALS, PHASE 1 TO PHASE 3)

| <i>Randomized placebo-controlled</i> |                | <i>2'MOE ASO dose (mg/week)</i> |                 |                   |                    |                    |                    |                |
|--------------------------------------|----------------|---------------------------------|-----------------|-------------------|--------------------|--------------------|--------------------|----------------|
|                                      | <i>Placebo</i> | <i>ASO total</i>                | <i>&gt;0–75</i> | <i>&gt;75–175</i> | <i>&gt;175–275</i> | <i>&gt;275–375</i> | <i>&gt;375–475</i> | <i>&gt;475</i> |
| <i>n</i>                             | 784            | 1,915                           | 164             | 318               | 1,013              | 177                | 202                | 41             |
| Gender                               |                |                                 |                 |                   |                    |                    |                    |                |
| Female                               | 330 (42.1%)    | 815 (42.6%)                     | 36 (22.0%)      | 148 (46.5%)       | 468 (46.2%)        | 67 (37.9%)         | 86 (42.6%)         | 10 (24.4%)     |
| Male                                 | 454 (57.9%)    | 1,100 (57.4%)                   | 128 (78.0%)     | 170 (53.5%)       | 545 (53.8%)        | 110 (62.1%)        | 116 (57.4%)        | 31 (75.6%)     |
| Race                                 |                |                                 |                 |                   |                    |                    |                    |                |
| White                                | 652 (83.2%)    | 1,601 (83.6%)                   | 137 (83.5%)     | 263 (82.7%)       | 836 (82.5%)        | 163 (92.1%)        | 169 (83.7%)        | 33 (80.5%)     |
| Black                                | 78 (9.9%)      | 171 (8.9%)                      | 16 (9.8%)       | 26 (8.2%)         | 94 (9.3%)          | 8 (4.5%)           | 20 (9.9%)          | 7 (17.1%)      |
| Asian                                | 25 (3.2%)      | 72 (3.8%)                       | 4 (2.4%)        | 15 (4.7%)         | 44 (4.3%)          | 2 (1.1%)           | 6 (3.0%)           | 1 (2.4%)       |
| Hispanic                             | 7 (0.9%)       | 16 (0.8%)                       | 0 (0.0%)        | 6 (1.9%)          | 4 (0.4%)           | 0 (0.0%)           | 6 (3.0%)           | 0 (0.0%)       |
| Other                                | 22 (2.8%)      | 51 (2.7%)                       | 7 (4.3%)        | 8 (2.5%)          | 34 (3.4%)          | 4 (2.3%)           | 1 (0.5%)           | 0 (0.0%)       |
| Age, years                           |                |                                 |                 |                   |                    |                    |                    |                |
| Mean (SD)                            | 50.2 (13.6)    | 49.8 (13.4)                     | 41.3 (13.3)     | 50.0 (13.2)       | 52.5 (12.6)        | 49.9 (11.9)        | 48.0 (13.5)        | 39.9 (15.3)    |
| BMI, kg/m <sup>2</sup>               |                |                                 |                 |                   |                    |                    |                    |                |
| Mean (SD)                            | 28.5 (4.8)     | 28.2 (5.0)                      | 26.1 (3.2)      | 28.1 (5.3)        | 28.9 (5.2)         | 28.3 (4.3)         | 27.2 (4.8)         | 26.9 (4.2)     |
| Platelets, K/μL                      |                |                                 |                 |                   |                    |                    |                    |                |
| Mean (SD)                            | 240.5 (61.7)   | 246.5 (68.4)                    | 239.4 (53.7)    | 251.6 (63.0)      | 244.3 (64.7)       | 244.1 (60.5)       | 261.0 (103.1)      | 227.2 (54.1)   |

Mean platelet results over time

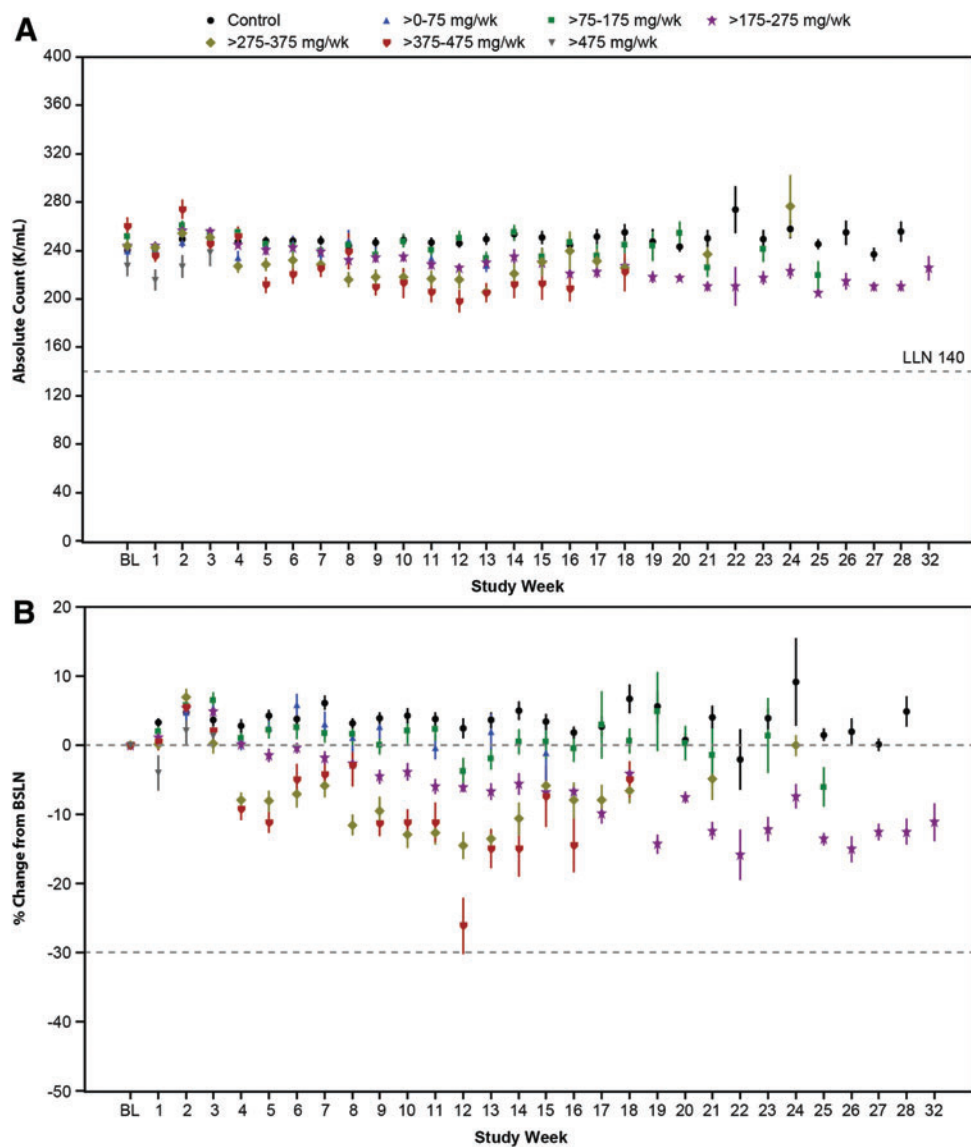

**SUPPLEMENTARY FIG. S1.** Mean platelet results over time in the randomized placebo-controlled dataset. (A) Absolute count and (B) % change from BSLN.

SUPPLEMENTARY TABLE S6. INCIDENCE OF CONFIRMED PLATELET REDUCTIONS IN RANDOMIZED PLACEBO-CONTROLLED TRIALS (42 TRIALS, PHASE 1 TO PHASE 3)

| Post-BSLN platelet count      |          |           | 2'MOE ASO dose (mg/week) |          |          |          |           |         |
|-------------------------------|----------|-----------|--------------------------|----------|----------|----------|-----------|---------|
| Confirmed, <sup>a</sup> n (%) | Placebo  | ASO total | >0-75                    | >75-175  | >175-275 | >275-375 | >375-475  | >475    |
| <i>n</i>                      | 777      | 1,877     | 158                      | 315      | 986      | 176      | 201       | 41      |
| <0.7×BSLN                     | 13 (1.7) | 158 (8.4) | 2 (1.3)                  | 10 (3.2) | 94 (9.5) | 17 (9.7) | 31 (15.4) | 4 (9.8) |
| <0.5×BSLN                     | 2 (0.3)  | 17 (0.9)  | 0 (0)                    | 0 (0)    | 8 (0.8)  | 0 (0)    | 9 (4.5)   | 0 (0)   |
| <i>n</i>                      | 777      | 1,878     | 158                      | 315      | 987      | 176      | 201       | 41      |
| <LLN                          | 24 (3.1) | 103 (5.5) | 2 (1.3)                  | 7 (2.2)  | 63 (6.4) | 12 (6.8) | 15 (7.5)  | 4 (9.8) |
| <75 K/μL                      | 1 (0.1)  | 3 (0.2)   | 0 (0)                    | 0 (0)    | 1 (0.1)  | 0 (0)    | 1 (0.5)   | 1 (2.4) |
| <50 K/μL                      | 0 (0)    | 0 (0)     | 0 (0)                    | 0 (0)    | 0 (0)    | 0 (0)    | 0 (0)     | 0 (0)   |
| <i>n</i> <sup>b</sup>         | 749      | 1,788     | 155                      | 298      | 936      | 170      | 189       | 40      |
| LLN-100 K/μL                  | 13 (1.7) | 74 (4.1)  | 1 (0.6)                  | 5 (1.6)  | 42 (4.5) | 11 (6.5) | 12 (6.3)  | 3 (7.5) |
| <100-75 K/μL                  | 0 (0)    | 3 (0.2)   | 0 (0)                    | 0 (0)    | 2 (0.2)  | 0 (0)    | 1 (0.5)   | 0 (0)   |
| <75-50 K/μL                   | 1 (0.1)  | 1 (0.06)  | 0 (0)                    | 0 (0)    | 0 (0)    | 0 (0)    | 1 (0.5)   | 0 (0)   |
| <50-25 K/μL                   | 0 (0)    | 0 (0)     | 0 (0)                    | 0 (0)    | 0 (0)    | 0 (0)    | 0 (0)     | 0 (0)   |
| <25 K/μL                      | 0 (0)    | 0 (0)     | 0 (0)                    | 0 (0)    | 0 (0)    | 0 (0)    | 0 (0)     | 0 (0)   |

<sup>a</sup>Confirmed was defined as a consecutive (next) abnormal laboratory value after the initial observation. If there was no consecutive test to confirm, then the initial observation was presumed confirmed.

<sup>b</sup>Number of subjects with normal BSLN platelet counts and with post-BSLN values. Lowest confirmed category was reported for each subject.

SUPPLEMENTARY TABLE S7. PLATELET REDUCTIONS OCCURRED PREDOMINANTLY ON TREATMENT IN 2'-O-METHOXYETHYL ANTISENSE OLIGONUCLEOTIDE-TREATED SUBJECTS

| Confirmed, <sup>a</sup> n (%) | Placebo<br>(n=784) | ASO total<br>(n=1,915) | 2'MOE ASO dose (mg/week) |                    |                       |                     |                     |                |
|-------------------------------|--------------------|------------------------|--------------------------|--------------------|-----------------------|---------------------|---------------------|----------------|
|                               |                    |                        | >0-75<br>(n=164)         | >75-175<br>(n=318) | >175-275<br>(n=1,013) | >275-375<br>(n=177) | >375-475<br>(n=202) | >475<br>(n=41) |
| (A) Platelets <0.7×BSLN       |                    |                        |                          |                    |                       |                     |                     |                |
| <i>n</i>                      | 777                | 1,877                  | 158                      | 315                | 986                   | 176                 | 201                 | 41             |
| Study period                  | 13 (1.7)           | 158 (8.4)              | 2 (1.3)                  | 10 (3.2)           | 94 (9.5)              | 17 (9.7)            | 31 (15.4)           | 4 (9.8)        |
| Treatment period              | 7 (0.9)            | 125 (6.7)              | 2 (1.3)                  | 4 (1.3)            | 77 (7.8)              | 16 (9.1)            | 24 (11.9)           | 2 (4.9)        |
| Follow-up period              | 6 (0.8)            | 33 (1.8)               | 0 (0.0)                  | 6 (1.9)            | 17 (1.7)              | 1 (0.6)             | 7 (3.5)             | 2 (4.9)        |
| (B) Platelets <LLN            |                    |                        |                          |                    |                       |                     |                     |                |
| <i>n</i>                      | 777                | 1,878                  | 158                      | 315                | 987                   | 176                 | 201                 | 41             |
| Study period                  | 24 (3.1)           | 103 (5.5)              | 2 (1.3)                  | 7 (2.2)            | 63 (6.4)              | 12 (6.8)            | 15 (7.5)            | 4 (9.8)        |
| Treatment period              | 17 (2.2)           | 83 (4.4)               | 2 (1.3%)                 | 5 (1.6)            | 50 (5.1)              | 11 (6.3)            | 13 (6.5)            | 2 (4.9)        |
| Follow-up period              | 7 (0.9)            | 20 (1.1)               | 0 (0.0)                  | 2 (0.6)            | 13 (1.3)              | 1 (0.6)             | 2 (1.0)             | 2 (4.9)        |

Incidence of (A) post-BSLN platelets <0.7×BSLN and (B) post-BSLN platelets <LLN.

<sup>a</sup>Confirmed was defined as a consecutive (next) abnormal laboratory value after the initial observation. If there was no consecutive test to confirm, then the initial observation was presumed confirmed.

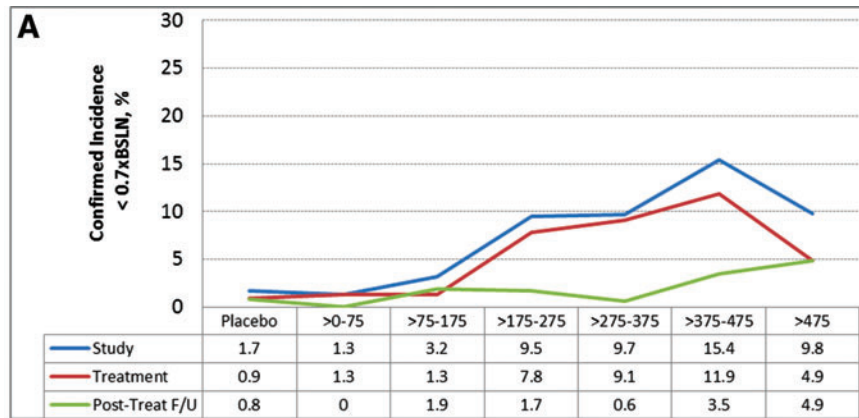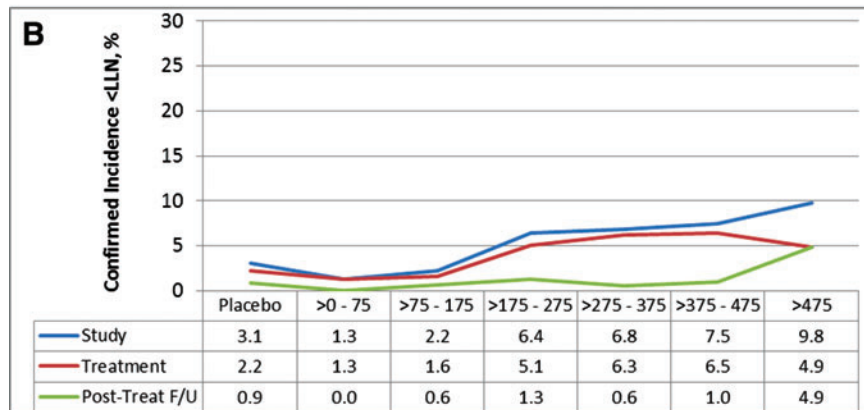

**SUPPLEMENTARY FIG. S2.** Incidence of platelet reductions during treatment and follow-up. (A) Post-BSLN platelets  $< 0.7 \times \text{BSLN}$  and (B) post-BSLN platelets  $< \text{LLN}$ .

*Statistical test for dose response in mean platelet levels*

Doses >75 mg/week produced greater reductions in platelet levels compared with placebo and the difference was statistically significant (Supplementary Table S8). Comparing adjacent 2'MOE ASO dose levels, the higher dose level always produced a greater reduction than the lower dose group in the mean percent change from BSLN in platelet counts. However, the difference was only statistically significant between the >175–275 and >75–175 mg/week as well as the >275–375 and >175–275 mg/week dose groups.

SUPPLEMENTARY TABLE S8. SUBJECT-LEVEL META-ANALYSIS IN MEAN % CHANGE FROM BASELINE, TREATMENT PERIOD

| <i>Comparison type/comparison</i>               | <i>ASO dose-level/<br/>placebo</i> | <i>No. of trials</i> | <i>n</i> | <i>LS mean (% change from BSLN)</i> | <i>LS mean difference (ASO-placebo)</i> | <i>95% CI</i> |
|-------------------------------------------------|------------------------------------|----------------------|----------|-------------------------------------|-----------------------------------------|---------------|
| <b>Placebo comparison</b>                       |                                    |                      |          |                                     |                                         |               |
| >0–75 mg/week vs. placebo                       | 2'MOE ASO                          | 12                   | 80       | 2                                   | –2.1                                    | –5.2, 1.0     |
|                                                 | Placebo                            | 12                   | 106      | 4.1                                 | —                                       | —             |
| >75–175 mg/week vs. placebo                     | 2'MOE ASO                          | 20                   | 173      | –3.4                                | –9.3                                    | –14.9, –3.6   |
|                                                 | Placebo                            | 20                   | 216      | 5.9                                 | —                                       | —             |
| >175–275 mg/week vs. placebo                    | 2'MOE ASO                          | 27                   | 823      | –8.9                                | –10.8                                   | –13.0, –8.5   |
|                                                 | Placebo                            | 27                   | 523      | 1.9                                 | —                                       | —             |
| >275–375 mg/week vs. placebo                    | 2'MOE ASO                          | 15                   | 150      | –12.9                               | –18.7                                   | –22.2, –15.2  |
|                                                 | Placebo                            | 15                   | 156      | 5.8                                 | —                                       | —             |
| >375–475 mg/week vs. placebo                    | 2'MOE ASO                          | 14                   | 137      | –17.8                               | –22.6                                   | –30.0, –15.2  |
|                                                 | Placebo                            | 14                   | 160      | 4.9                                 | —                                       | —             |
| <b>Adjacent 2'MOE ASO dose-level comparison</b> |                                    |                      |          |                                     |                                         |               |
| >0–75 mg/week vs. placebo                       | High dose                          | 12                   | 80       | 2                                   | –2.1                                    | –5.2, 1.0     |
|                                                 | Low dose                           | 12                   | 106      | 4.1                                 | —                                       | —             |
| >75–175 mg/week vs. >0–75 mg/week               | High dose                          | 12                   | 74       | 1.3                                 | –0.7                                    | –5.0, 3.5     |
|                                                 | Low dose                           | 12                   | 80       | 2                                   | —                                       | —             |
| >175–275 mg/week vs. >75–175 mg/week            | High dose                          | 17                   | 191      | –11.2                               | –7.9                                    | –11.3, –4.6   |
|                                                 | Low dose                           | 17                   | 164      | –3.3                                | —                                       | —             |
| >275–375 mg/week vs. >175–275 mg/week           | High dose                          | 10                   | 97       | –11.4                               | –3.7                                    | –6.9, –0.4    |
|                                                 | Low dose                           | 10                   | 113      | –7.7                                | —                                       | —             |
| >375–475 mg/week vs. >275–375 mg/week           | High dose                          | 6                    | 39       | –10.2                               | –3.3                                    | –7.9, 1.3     |
|                                                 | Low dose                           | 6                    | 39       | –6.9                                | —                                       | —             |

Statistics: analysis only included data from subjects assigned to receive multiple SC doses. ANCOVA with protocol and dose category as factor variables, and BSLN platelet value as a covariate was applied for statistical analysis. Negative estimates mean that the high-dose category had a larger reduction in platelet change (% scale) compared with the low-dose category. 95% CIs that did not include 0 were statistically significant at the two-sided 5% significance level.

SC, subcutaneous.

*Statistical test for dose response in the incidence of platelet reductions >30% from BSLN*

An increase in incidence of confirmed post-BSLN platelet reductions >30% from BSLN was observed when comparing each successive dose level with placebo as well as adjacent 2'MOE ASO dose levels with an increased risk in higher dose levels (Supplementary Table S9). When compared with placebo, increasing 2'MOE ASO dose levels had greater reductions in platelet levels and were statistically significant for doses >175 mg/week. Comparing adjacent dose levels, estimated incidence was greater and statistically significant at the 5% level only for the >175–275 mg/week group when compared with the >75–175 mg/week group.

SUPPLEMENTARY TABLE S9. SUBJECT-LEVEL META-ANALYSIS OF THE INCIDENCE OF PLATELET REDUCTIONS >30% FROM BASELINE (<0.7×BSLN), TREATMENT PERIOD

| <i>Comparison type/comparison</i>               | <i>No. of trials</i> | <i>Low ASO dose-level/placebo events/n</i> | <i>High ASO dose-level events/n</i> | <i>Mantel-Haenszel risk difference/100 patients (high-low)</i> | <i>95% CI</i> |
|-------------------------------------------------|----------------------|--------------------------------------------|-------------------------------------|----------------------------------------------------------------|---------------|
| <b>Placebo comparison</b>                       |                      |                                            |                                     |                                                                |               |
| >0–75 mg/week vs. placebo                       | 12                   | 1/106                                      | 2/80                                | 2                                                              | –2.0, 6.0     |
| >75–175 mg/week vs. placebo                     | 20                   | 2/216                                      | 3/172                               | 0.8                                                            | –1.5, 3.0     |
| >175–275 mg/week vs. placebo                    | 27                   | 7/522                                      | 74/824                              | 7.6                                                            | 5.4, 9.7      |
| >275–375 mg/week vs. placebo                    | 15                   | 0/156                                      | 11/149                              | 7.4                                                            | 3.5, 11.3     |
| >375–475 mg/week vs. placebo                    | 14                   | 2/160                                      | 24/132                              | 16.7                                                           | 10.5, 22.8    |
| <b>Adjacent 2'MOE ASO dose-level comparison</b> |                      |                                            |                                     |                                                                |               |
| >0–75 mg/week vs. placebo                       | 12                   | 1/106                                      | 2/80                                | 2                                                              | –2.0, 6.0     |
| >75–175 mg/week vs. >0–75 mg/week               | 12                   | 2/80                                       | 1/74                                | –1.3                                                           | –5.8, 3.2     |
| >175–275 mg/week vs. >75–175 mg/week            | 17                   | 3/163                                      | 11/191                              | 5.1                                                            | 0.9, 9.3      |
| >275–375 mg/week vs. >175–275 mg/week           | 10                   | 2/113                                      | 6/96                                | 3.8                                                            | –1.0, 8.7     |
| >375–475 mg/week vs. >275–375 mg/week           | 6                    | 0/39                                       | 2/39                                | 5.0                                                            | –1.9, 11.9    |

Statistics: analysis evaluated data from subjects assigned to receive multiple SC doses. The stratified Mantel-Haenszel method for common risk difference, with protocol as the stratification factor, was used to test for differences between 2'MOE ASO dose groups and placebo, as well as between 2'MOE ASO dose levels. Positive estimates mean that the high-dose category had a greater percent with a platelet reduction >30% during the treatment period compared with the low-dose category. 95% CIs that did not include 0 are statistically significant at the two-sided 5% significance level.

CI, confidence interval.

**Effect of Concomitant Antithrombotic Agents**

SUPPLEMENTARY TABLE S10. ANTITHROMBOTIC MEDICATIONS REPORTED IN 6-MONTH, PHASE 3 MIPOMERSEN TRIALS BY WHO ATC CLASS AND PREFERRED MEDICATION NAME

| <i>WHO ATC class/ Preferred medication name, n (%)</i>                 | <i>Placebo (n=129)</i> | <i>Mipomersen (n=261)</i> | <i>Total (n=390)</i> |
|------------------------------------------------------------------------|------------------------|---------------------------|----------------------|
| Subjects receiving any prior or concomitant antithrombotic medications | 86 (66.7)              | 192 (73.6)                | 278 (71.3)           |
| Platelet aggregation inhibitors excl. heparin                          | 19 (14.7)              | 44 (16.9)                 | 63 (16.2)            |
| Clopidogrel                                                            | 19 (14.7)              | 41 (15.7)                 | 60 (15.4)            |
| Asasantin                                                              | 0 (0.0)                | 2 (0.8)                   | 2 (0.5)              |
| Abciximab                                                              | 0 (0.0)                | 1 (0.4)                   | 1 (0.3)              |
| Cilostazol                                                             | 0 (0.0)                | 1 (0.4)                   | 1 (0.3)              |
| Dipyridamole                                                           | 0 (0.0)                | 1 (0.4)                   | 1 (0.3)              |
| Prasugrel                                                              | 1 (0.8)                | 0 (0.0)                   | 1 (0.3)              |
| Salicylic acid and derivatives                                         | 84 (65.1)              | 176 (67.4)                | 260 (66.7)           |
| Acetylsalicylic acid                                                   | 83 (64.3)              | 176 (67.4)                | 259 (66.4)           |
| Couldina                                                               | 0 (0.0)                | 1 (0.4)                   | 1 (0.3)              |
| Salicylamide                                                           | 0 (0.0)                | 1 (0.4)                   | 1 (0.3)              |
| Salicylic acid and derivatives                                         | 1 (0.8)                | 0 (0.0)                   | 1 (0.3)              |
| Heparin group                                                          | 5 (3.9)                | 10 (3.8)                  | 15 (3.8)             |
| Heparin                                                                | 2 (1.6)                | 6 (2.3)                   | 8 (2.1)              |
| Heparin fraction, sodium salt                                          | 2 (1.6)                | 1 (0.4)                   | 3 (0.8)              |
| Enoxaparin                                                             | 1 (0.8)                | 7 (2.7)                   | 8 (2.1)              |
| Vitamin K antagonists                                                  | 3 (2.3)                | 12 (4.6)                  | 15 (3.8)             |
| Warfarin sodium                                                        | 3 (2.3)                | 12 (4.6)                  | 15 (3.8)             |
| Direct thrombin inhibitors                                             | 1 (0.8)                | 2 (0.8)                   | 3 (0.8)              |
| Bivalirudin                                                            | 1 (0.8)                | 2 (0.8)                   | 3 (0.8)              |



SUPPLEMENTARY TABLE S11. INCIDENCE OF BLEEDING EVENTS IN 6-MONTH, PHASE 3  
MIPOMERSEN TRIALS, STANDARDIZED MEDDRA QUERY OF TREATMENT PERIOD

| <i>MedDRA SOC/preferred term, n (%)</i>              | <i>Placebo</i> | <i>Mipomersen</i> |
|------------------------------------------------------|----------------|-------------------|
| <i>n</i>                                             | 129            | 261               |
| Any bleeding event <sup>a</sup>                      | 2 (1.6)        | 3 (1.1)           |
| Antithrombotic agent, yes                            | 2 (1.6)        | 2 (0.8)           |
| Injury, poisoning, and procedural complications      | 1 (0.8)        | 1 (0.4)           |
| Contusion                                            | 1 (0.8)        | 1 (0.4)           |
| Investigations                                       | 0 (0)          | 1 (0.4)           |
| Hematocrit decreased                                 | 0 (0)          | 1 (0.4)           |
| Respiratory, thoracic, and mediastinal disorders     | 1 (0.8)        | 0 (0)             |
| Epistaxis                                            | 1 (0.8)        | 0 (0)             |
| Skin and subcutaneous tissue disorders               | 0 (0)          | 1 (0.4)           |
| Ecchymosis                                           | 0 (0)          | 1 (0.4)           |
| General disorders and administration site conditions | 20 (15.5)      | 95 (36.4)         |
| Injection site hematoma                              | 18 (14.0)      | 83 (31.8)         |
| Injection site hemorrhage                            | 2 (1.6)        | 16 (6.1)          |

Table shows any bleeding event reported as possibly related, related, or of unknown relationship to study drug during the treatment period. SOC denotes system organ class.

<sup>a</sup>Events reported under the general disorders and administration site conditions SOC were excluded from the any bleeding event analysis.

## Effect of 2'MOE ASO treatment on coagulation [9–12]

SUPPLEMENTARY TABLE S12. INCIDENCE OF ABNORMAL COAGULATION TIMES IN RANDOMIZED PLACEBO-CONTROLLED TRIALS DURING STEADY-STATE CONDITIONS OF THE DRUG ELIMINATION PHASE

| <i>Incidence of abnormal coagulation<sup>a</sup></i> | <i>ASO dose (mg/week)</i> |                  |                 |                   |                       |                      |                    |                |
|------------------------------------------------------|---------------------------|------------------|-----------------|-------------------|-----------------------|----------------------|--------------------|----------------|
|                                                      | <i>Placebo</i>            | <i>ASO total</i> | <i>&gt;0–75</i> | <i>&gt;75–175</i> | <i>&gt;175–275</i>    | <i>&gt;275–375</i>   | <i>&gt;375–475</i> | <i>&gt;475</i> |
| <i>n (%)</i>                                         |                           |                  |                 |                   |                       |                      |                    |                |
| APTT, <i>n</i>                                       | 425                       | 1,002            | 68              | 132               | 568                   | 125                  | 88                 | 21             |
| >1.4×ULN or BSLN if >ULN                             | 1 (0.2)                   | 3 (0.3)          | 0 (0.0)         | 0 (0.0)           | 3 (0.5)               | 0 (0.0)              | 0 (0.0)            | 0 (0.0)        |
| >2.5×ULN or BSLN if >ULN                             | 0 (0.0)                   | 0 (0.0)          | 0 (0.0)         | 0 (0.0)           | 0 (0.0)               | 0 (0.0)              | 0 (0.0)            | 0 (0.0)        |
| PT, <i>n</i>                                         | 393                       | 888              | 60              | 105               | 522                   | 108                  | 74                 | 19             |
| >1.2×ULN, or BSLN if >ULN                            | 5 (1.3) <sup>b</sup>      | 15 (1.7)         | 0 (0.0)         | 0 (0.0)           | 13 (2.5) <sup>c</sup> | 1 (0.9) <sup>d</sup> | 1 (1.4)            | 0 (0.0)        |

<sup>a</sup>Subjects had to have received at least two doses of study drug. Incidence based on observations from the last measure collected 5 days or more after a dose and before the end of the treatment period (10 days post last dose). Data from the FXI ASO trials were excluded due to the known pharmacological effect on APTT [8].

<sup>b</sup>Five of five taking anticoagulants.

<sup>c</sup>Ten of 13 taking anticoagulants.

<sup>d</sup>One of one taking anticoagulants.

APTT, activated partial thromboplastin time; PT, prothrombin time; ULN, upper limit of normal.

## References

- Smith D, D Schulz, G Kloss and W Cheng. (2010). Considerations for building an integrated safety database using SAS. [www.lexjansen.com/pharmasug/2010/AD/AD15.pdf](http://www.lexjansen.com/pharmasug/2010/AD/AD15.pdf) (accessed on January 11, 2017).
- Raal FJ, RD Santos, DJ Blom, AD Marais, MJ Charng, WC Cromwell, RH Lachmann, D Gaudet, JL Tan, *et al.* (2010). Mipomersen, an apolipoprotein B synthesis inhibitor, for lowering of LDL cholesterol concentrations in patients with homozygous familial hypercholesterolaemia: a randomised, double-blind, placebo-controlled trial. *Lancet* 375:998–1006.
- McGowan MP, JC Tardif, R Ceska, LJ Burgess, H Soran, I Gouni-Berthold, G Wagener and S Chasan-Taber. (2012). Randomized, placebo-controlled trial of mipomersen in patients with severe hypercholesterolemia receiving maximally tolerated lipid-lowering therapy. *PLoS One* 7:e49006.
- Stein EA, R Dufour, C Gagne, D Gaudet, C East, JM Donovan, W Chin, DL Tribble and M McGowan. (2012). Apolipoprotein B synthesis inhibition with mipomersen in heterozygous familial hypercholesterolemia: results of a randomized, double-blind, placebo-controlled trial to assess efficacy and safety as add-on therapy in patients with coronary artery disease. *Circulation* 126:2283–2292.

5. Thomas GS, WC Cromwell, S Ali, W Chin, JD Flaim and M Davidson. (2013). Mipomersen, an apolipoprotein B synthesis inhibitor, reduces atherogenic lipoproteins in patients with severe hypercholesterolemia at high cardiovascular risk: a randomized, double-blind, placebo-controlled trial. *J Am Coll Cardiol* 62:2178–2184.
6. Santos RD, PB Duell, C East, JR Guyton, PM Moriarty, W Chin and RS Mittleman. (2015). Long-term efficacy and safety of mipomersen in patients with familial hypercholesterolaemia: 2-year interim results of an open-label extension. *Eur Heart J* 36:566–575.
7. Ballantyne C, AL Catapano, M Davidson, R Mittleman, PM Moriarty, RD Santos, C Sensinger, S de Banerjee, W Singleton, *et al.* (2016). Efficacy and safety of mipomersen in patients with familial hypercholesterolemia and inadequately controlled LDL-C levels. *Arteriosclerosis, Thrombosis and Vascular Biology | Peripheral Vascular Disease Scientific Sessions*. Nashville, Tennessee.
8. Büller HR, C Bethune, S Bhanot, D Gailani, BP Monia, GE Raskob, A Segers, P Verhamme and JI Weitz. (2015). FXI-ASO TKA Investigators. Factor XI antisense oligonucleotide for prevention of venous thrombosis. *N Engl J Med* 372:232–240.
9. Sewell KL, RS Geary, BF Baker, JM Glover, TG Mant, RZ Yu, JA Tami and FA Dorr. (2002). Phase I trial of ISIS 104838, a 2'-methoxyethyl modified antisense oligonucleotide targeting tumor necrosis factor- $\alpha$ . *J Pharmacol Exp Ther* 303:1334–1343.
10. Kwoh TJ. (2007). An overview of the clinical safety experience of first- and second generation antisense oligonucleotides. In: *Antisense Drug Technology Principles, Strategies, and Applications*, 2nd edition. Crooke ST, ed. CRC Press, New York, pp. 365–399.
11. Henry SP, T Kim, K Kramer-Strickland, TA Zanardi, RA Fey and AA Levin. (2007). Toxicologic properties of 2'-O-methoxyethyl chimeric antisense inhibitors in animals and man. In: *Antisense Drug Technology Principles, Strategies, and Applications*, 2nd edition. Crooke ST, ed. CRC Press, New York, pp. 327–363.
12. Crooke ST, BF Baker, TJ Kwoh, W Cheng, DJ Schulz, S Xia, N Salgado, HH Bui, CE Hart, *et al.* (2016). Integrated safety assessment of 2'-O-methoxyethyl chimeric antisense oligonucleotides in non-human primates and healthy human volunteers. *Mol Ther* 24:1771–1782.
